# Supplementary material for: Multifunctional NaEu(WO4)2: defect-tuned red emission and acetone sensing at room temperature
Source: Royal Society of Chemistry journal article supplement (doi:10.1039/d4ma00617h), 2024-01-01
Supplement: d4ma00617h1.pdf [file d4ma00617h1.pdf]

## Electronic Supplementary Information (ESI)

### Multifunctional NaEu(WO<sub>4</sub>)<sub>2</sub>: defect-tuned red emission and acetone sensing at room temperature

Kumar Riddhiman Sahoo,<sup>(a)</sup> Tanushri Das,<sup>(b)</sup> Mrinal Pal,<sup>(b)</sup> Mohammad Rezaul Karim,<sup>(c)</sup>  
Asiful H. Seikh<sup>(c)</sup> and Chandan Kumar Ghosh<sup>(a)\*</sup>

<sup>(a)</sup> School of Materials Science and Nanotechnology, Jadavpur University, Jadavpur, Kolkata – 700032, India

<sup>(b)</sup> CSIR-Central Glass and Ceramic Research Institute, Kolkata – 700032, India

<sup>(c)</sup> Center of Excellence for Research in Engineering Materials (CEREM), Deanship of Scientific Research, College of Engineering, King Saud University, Riyadh, 11421, Saudi Arabia

<sup>(\*)</sup> Corresponding author's email ID: [chandu\\_ju@yahoo.co.in](mailto:chandu_ju@yahoo.co.in), Tel: 033-2457-3028

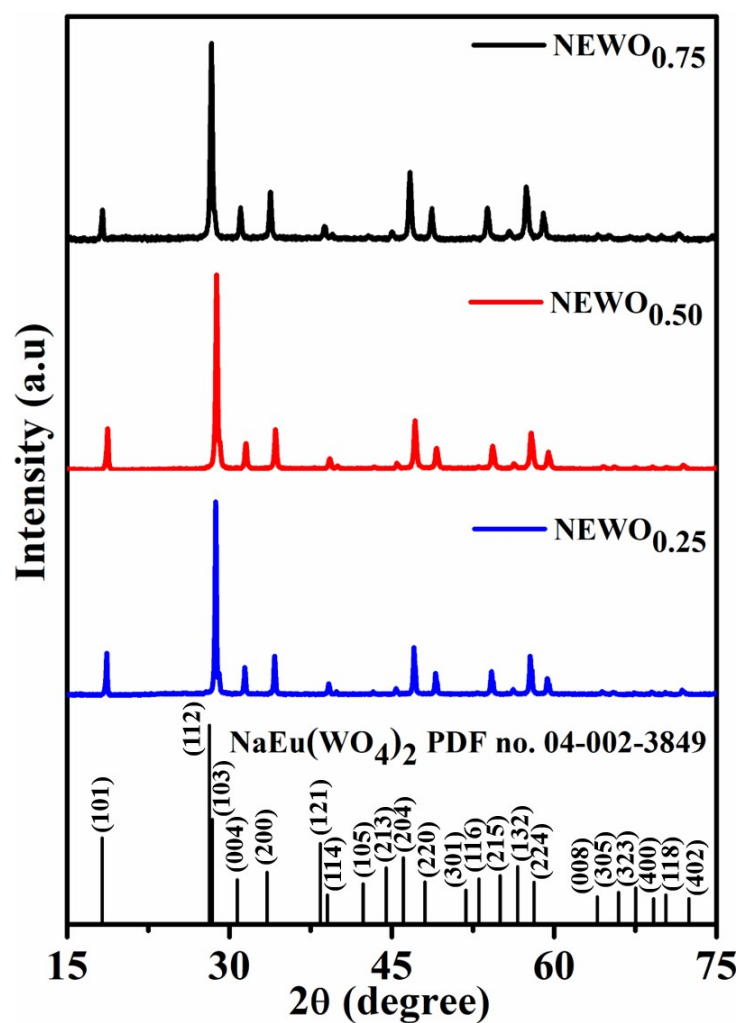

Figure S1 XRD spectrum of  $\text{NEWO}_{0.75}$ ,  $\text{NEWO}_{0.50}$  and  $\text{NEWO}_{0.25}$  samples.

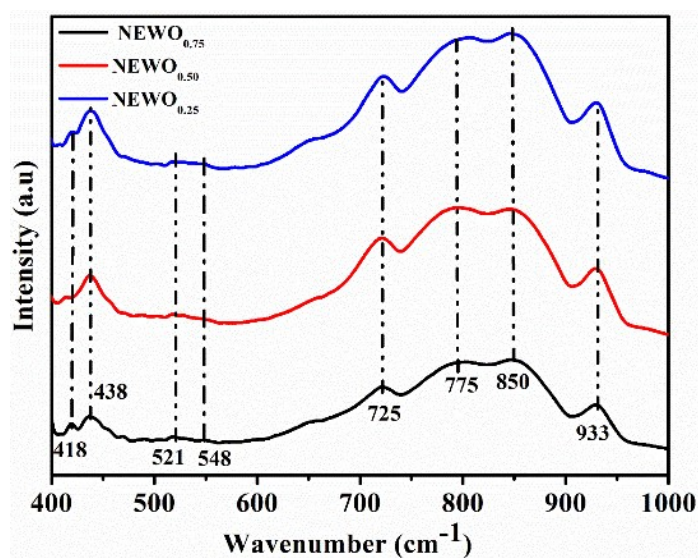

Figure S2 FTIR spectra of  $\text{NEWO}_{0.75}$ ,  $\text{NEWO}_{0.50}$  and  $\text{NEWO}_{0.25}$  samples.

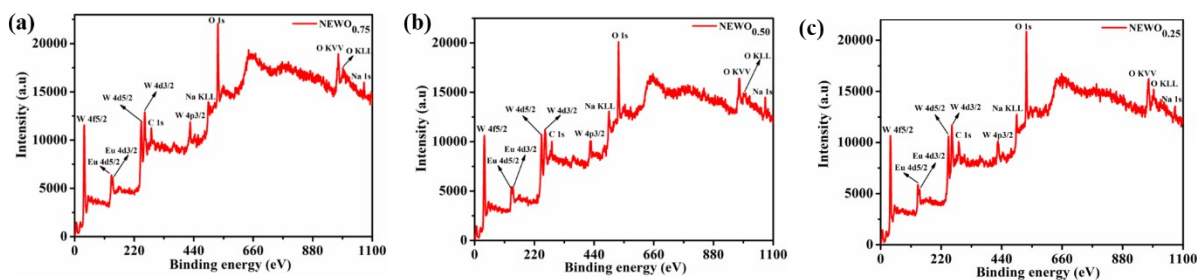

**Figure S3** XPS survey spectrum of (a)  $\text{NEWO}_{0.75}$ , (b)  $\text{NEWO}_{0.50}$  and (c)  $\text{NEWO}_{0.25}$  samples.

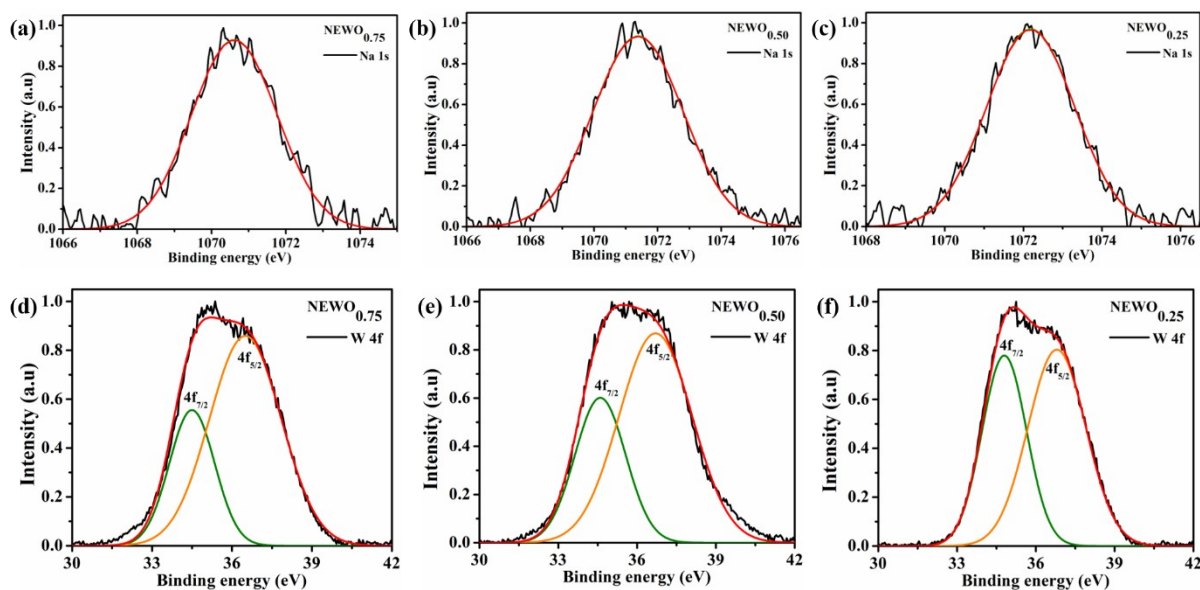

**Figure S4** XPS high resolution spectra of Na 1s: (a)  $\text{NEWO}_{0.75}$ , (b)  $\text{NEWO}_{0.50}$ , (c)  $\text{NEWO}_{0.25}$  samples and W 4f: (d)  $\text{NEWO}_{0.75}$ , (e)  $\text{NEWO}_{0.50}$ , (f)  $\text{NEWO}_{0.25}$  samples.

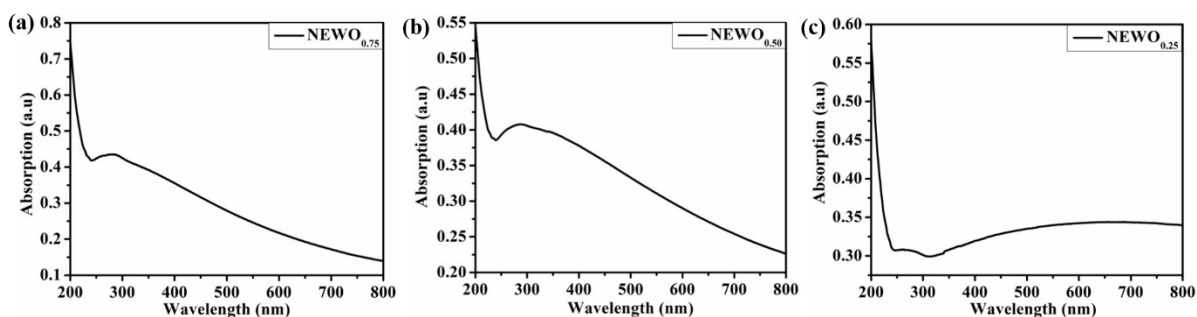

**Figure S5** UV-Vis absorption spectra: (a)  $\text{NEWO}_{0.75}$ , (b)  $\text{NEWO}_{0.50}$  and (c)  $\text{NEWO}_{0.25}$  samples.

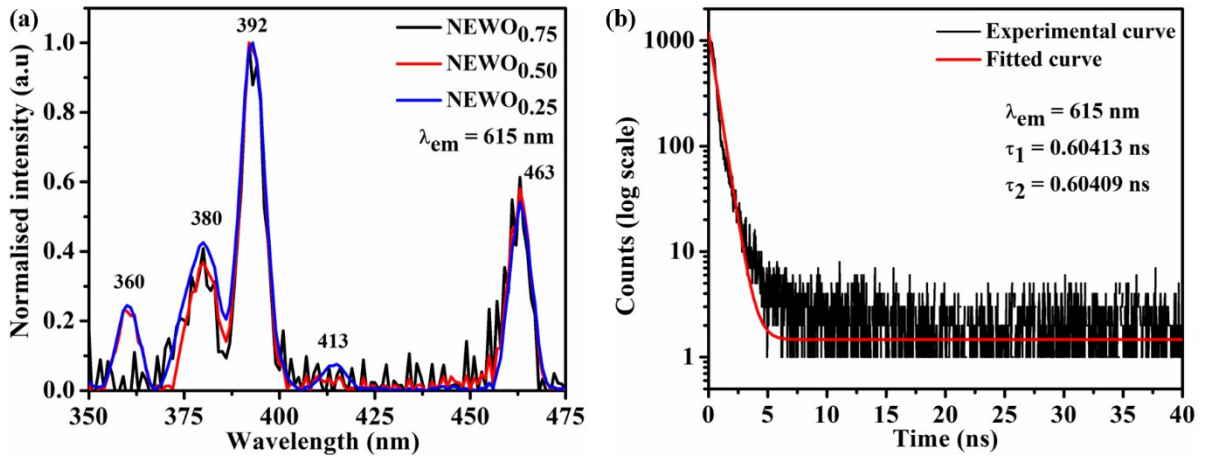

**Figure S6** (a) PLE spectra of  $\text{NEWO}_{0.75}$ ,  $\text{NEWO}_{0.50}$  and  $\text{NEWO}_{0.25}$  samples, (b) Decay curve of  $\text{NEWO}_{0.25}$ .

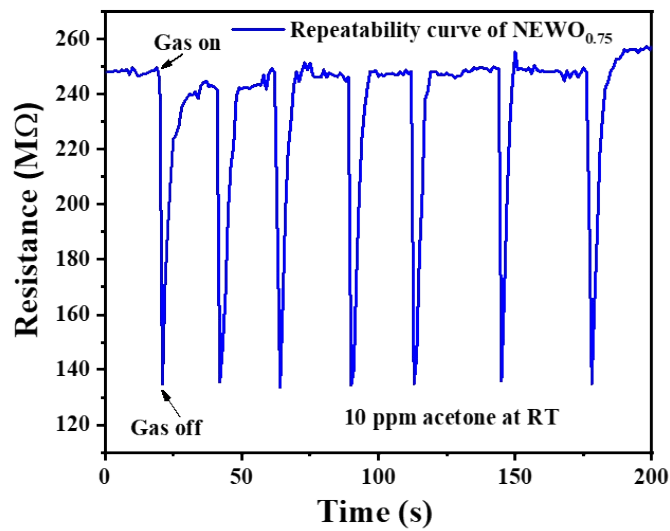

**Figure S7** Repeatability data for  $\text{NEWO}_{0.75}$  upon seven cycles of exposure to 10 ppm acetone at RT.

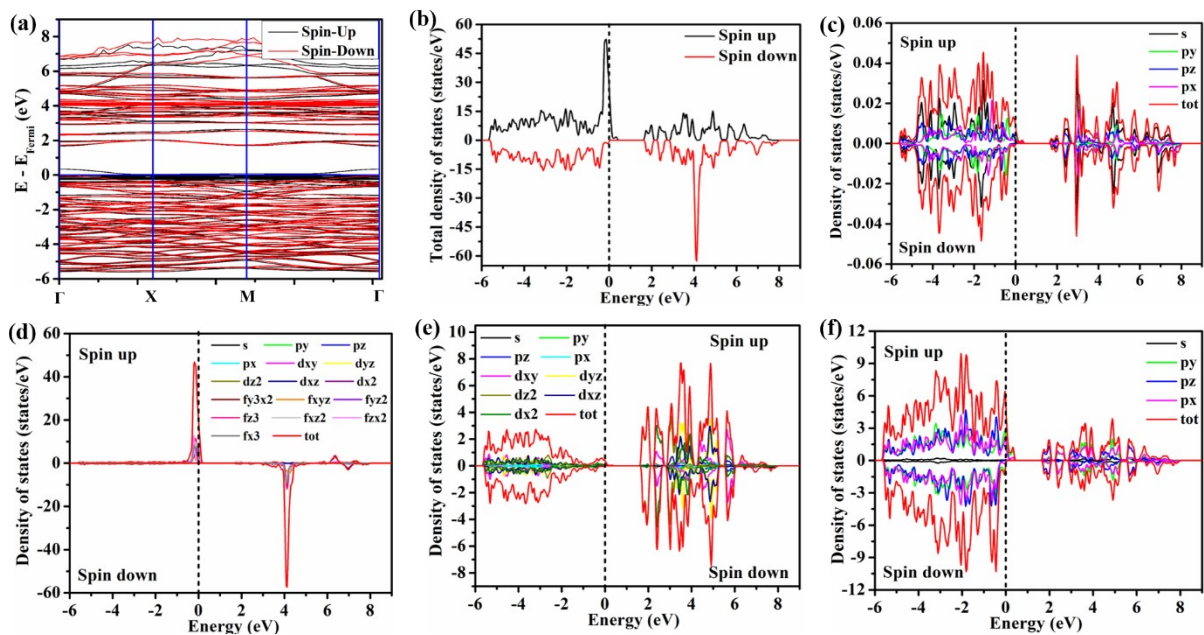

**Figure S8** DFT of  $\text{NEWO}_{0.25}$ : (a) Band structure, (b) TDOS, (c) DOS of Na, (d) DOS of Eu, (e) DOS of W, (f) DOS of O.

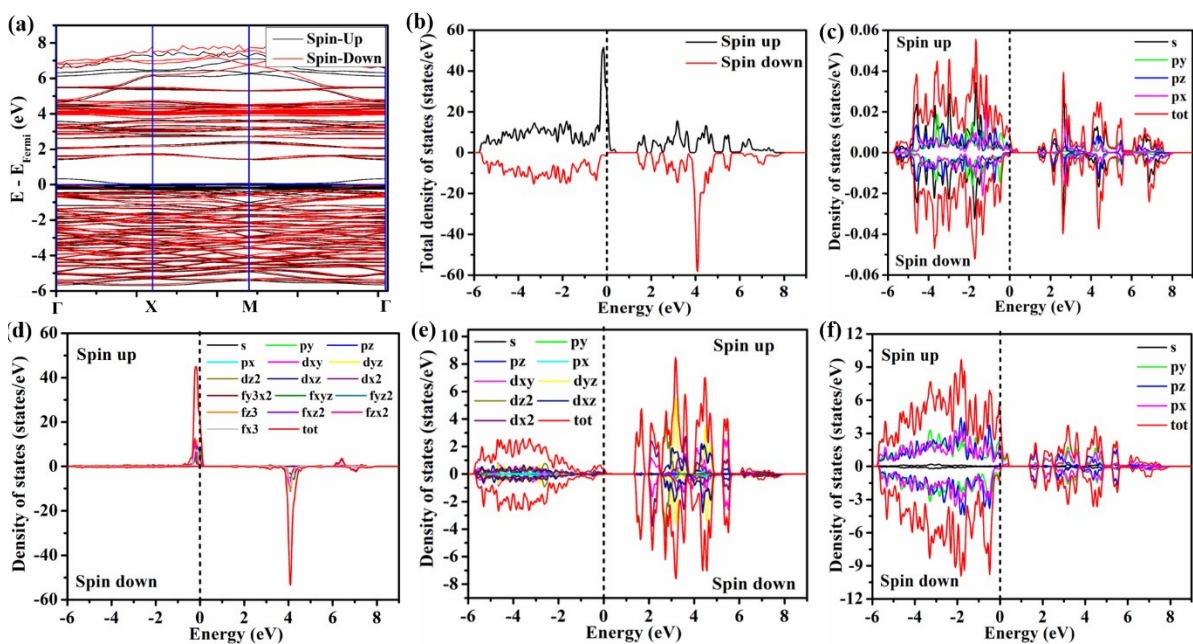

**Figure S9** DFT of  $\text{NEWO}_{0.50}$ : (a) Band structure, (b) TDOS, (c) DOS of Na, (d) DOS of Eu, (e) DOS of W, (f) DOS of O.

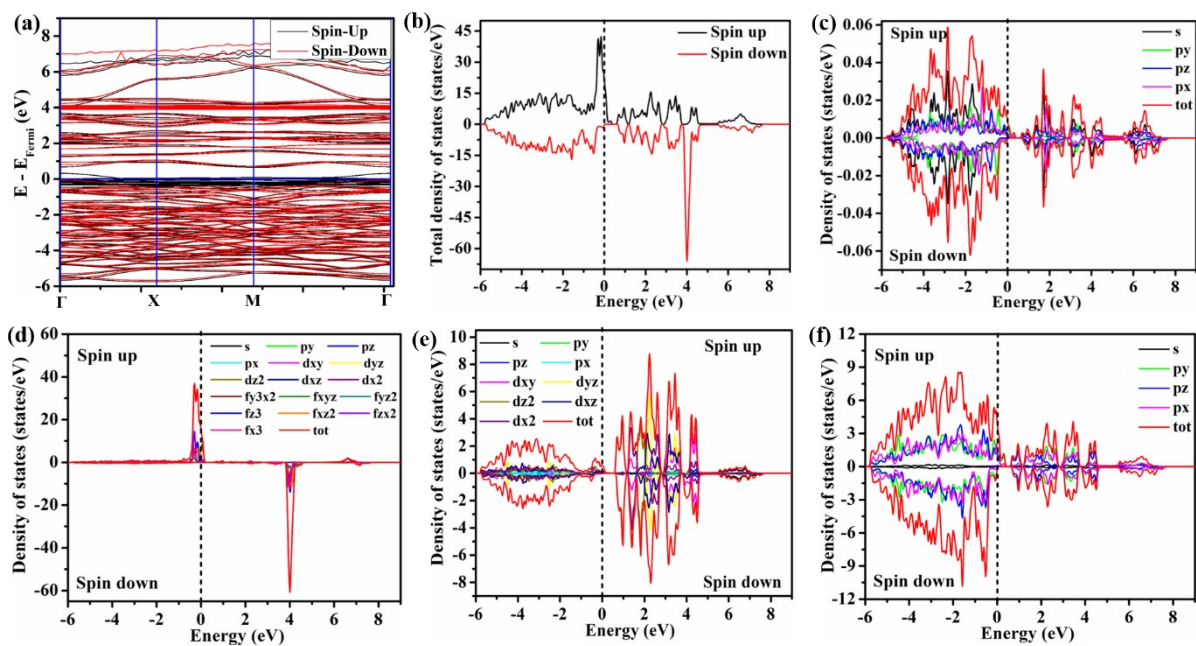

**Figure S10** DFT of  $\text{NEWO}_{0.75}$ : (a) Band structure, (b) TDOS, (c) DOS of Na, (d) DOS of Eu, (e) DOS of W, (f) DOS of O.

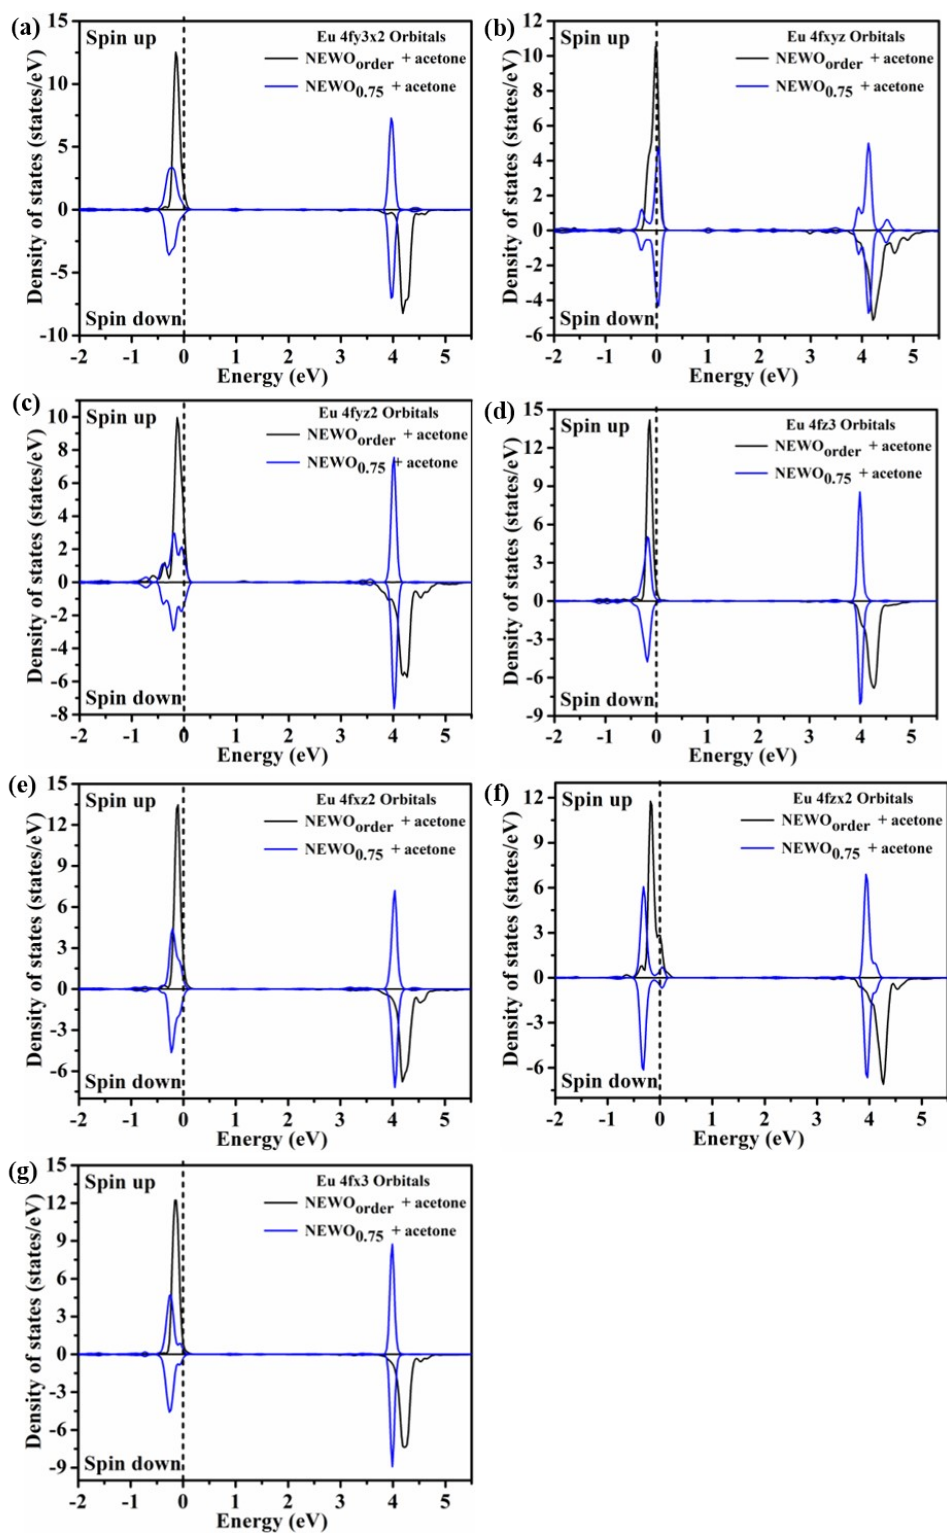

**Figure S11** PDOS plot of (0 0 4) slab surface + acetone molecule: (a) Eu  $4f_y^3x^2$  orbitals, (b) Eu  $4f_{xyz}$  orbitals, (c) Eu  $4f_{yz^2}$  orbitals, (d) Eu  $4f_z^3$  orbitals, (e) Eu  $4f_{xz^2}$  orbitals, (f) Eu  $4f_{zx^2}$  orbitals, (g) Eu  $4f_x^3$  orbitals.

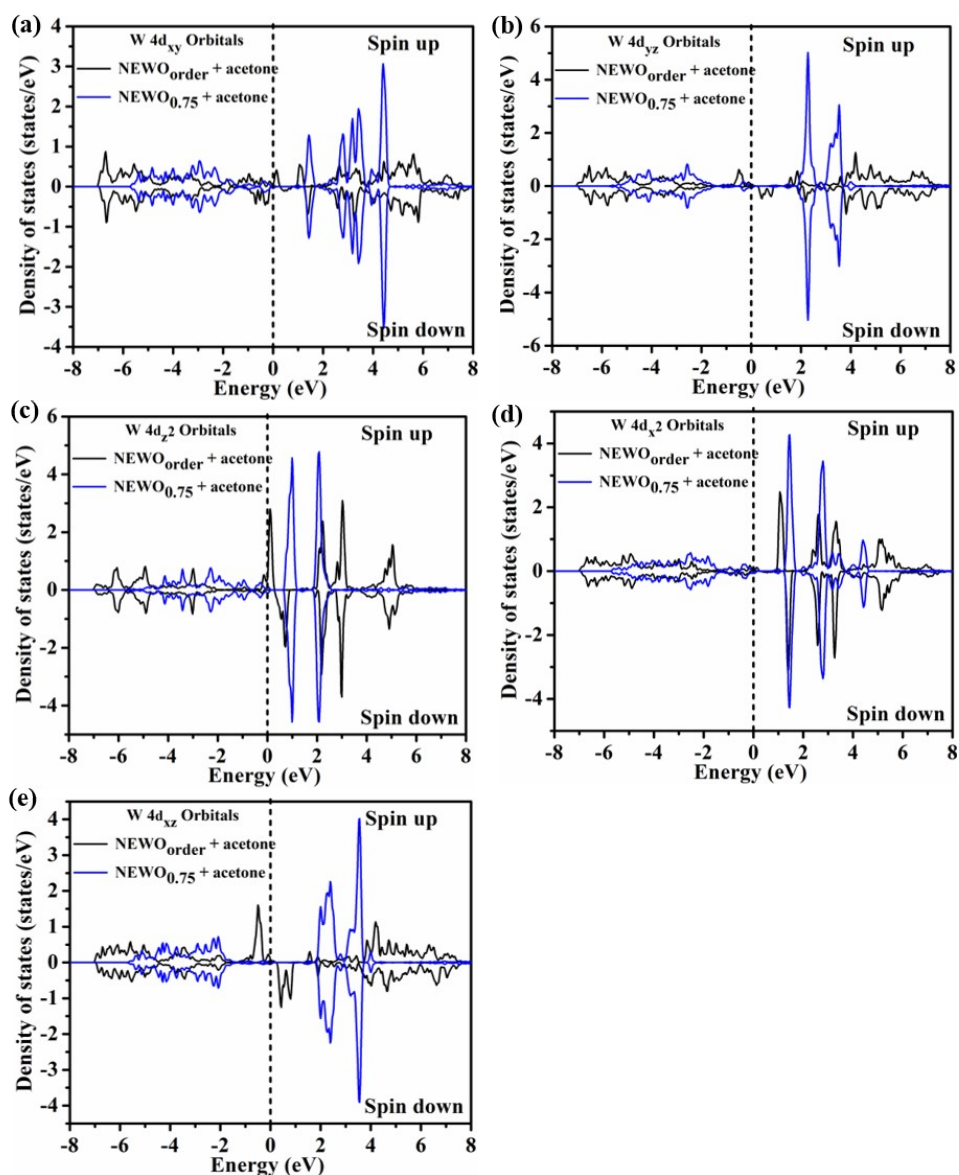

**Figure S12** PDOS plot of (0 0 4) slab surface + acetone molecule: (a) W  $4d_{xy}$  orbitals, (b) W  $4d_{yz}$  orbitals, (c) W  $4d_z^2$  orbitals, (d) W  $4d_x^2$  orbitals, (e) W  $4d_{xz}$  orbitals.
